# Whole Grain Products, Fish and Bilberries Alter Glucose and Lipid Metabolism in a Randomized, Controlled Trial: The Sysdimet Study

Maria Lankinen<sup>1,2\*</sup>, Ursula Schwab<sup>2,3</sup>, Marjukka Kolehmainen<sup>4</sup>, Jussi Paananen<sup>4</sup>, Kaisa Poutanen<sup>4,5</sup>, Hannu Mykkänen<sup>2</sup>, Tuulikki Seppänen-Laakso<sup>5</sup>, Helena Gylling<sup>2,3</sup>, Matti Uusitupa<sup>2,6</sup>, Matej Orešič<sup>5</sup>

**1** VTT Technical Research Centre of Finland, Kuopio, Finland, **2** Department of Clinical Nutrition, Institute of Public Health and Clinical Nutrition, University of Eastern Finland, Kuopio, Finland, **3** Institute of Clinical Medicine, Internal Medicine, Kuopio University Hospital, Kuopio, Finland, **4** Department of Clinical Nutrition, Food and Health Research Centre, Institute of Public Health and Clinical Nutrition, University of Eastern Finland, Kuopio, Finland, **5** VTT Technical Research Centre of Finland, Espoo, Finland, **6** Research Unit, Kuopio University Hospital, Kuopio, Finland

## Abstract

**Background:** Due to the growing prevalence of type 2 diabetes, new dietary solutions are needed to help improve glucose and lipid metabolism in persons at high risk of developing the disease. Herein we investigated the effects of low-insulin-response grain products, fatty fish, and berries on glucose metabolism and plasma lipidomic profiles in persons with impaired glucose metabolism.

**Methodology/Principal Findings:** Altogether 106 men and women with impaired glucose metabolism and with at least two other features of the metabolic syndrome were included in a 12-week parallel dietary intervention. The participants were randomized into three diet intervention groups: (1) whole grain and low postprandial insulin response grain products, fatty fish three times a week, and bilberries three portions per day (HealthyDiet group), (2) Whole grain enriched diet (WGED) group, which includes principally the same grain products as group (1), but with no change in fish or berry consumption, and (3) refined wheat breads (Control). Oral glucose tolerance, plasma fatty acids and lipidomic profiles were measured before and after the intervention. Self-reported compliance with the diets was good and the body weight remained constant. Within the HealthyDiet group two hour glucose concentration and area-under-the-curve for glucose decreased and plasma proportion of (n-3) long-chain PUFAs increased (False Discovery Rate p-values <0.05). Increases in eicosapentaenoic acid and docosahexaenoic acid associated curvilinearly with the improved insulin secretion and glucose disposal. Among the 364 characterized lipids, 25 changed significantly in the HealthyDiet group, including multiple triglycerides incorporating the long chain (n-3) PUFA.

**Conclusions/Significance:** The results suggest that the diet rich in whole grain and low insulin response grain products, bilberries, and fatty fish improve glucose metabolism and alter the lipidomic profile. Therefore, such a diet may have a beneficial effect in the efforts to prevent type 2 diabetes in high risk persons.

**Trial Registration:** ClinicalTrials.gov NCT00573781

**Citation:** Lankinen M, Schwab U, Kolehmainen M, Paananen J, Poutanen K, et al. (2011) Whole Grain Products, Fish and Bilberries Alter Glucose and Lipid Metabolism in a Randomized, Controlled Trial: The Sysdimet Study. PLoS ONE 6(8): e22646. doi:10.1371/journal.pone.0022646

**Editor:** Jose A. L. Calbet, University of Las Palmas de Gran Canaria, Spain

**Received:** February 17, 2011; **Accepted:** June 27, 2011; **Published:** August 25, 2011

**Copyright:** © 2011 Lankinen et al. This is an open-access article distributed under the terms of the Creative Commons Attribution License, which permits unrestricted use, distribution, and reproduction in any medium, provided the original author and source are credited.

**Funding:** Funding was provided by Academy of Finland (The Research Program on Nutrition, Foods and Health (ELVIRA), Decision number 117844 for MU and 117996 for MO), European Commission in the Communities 6th Framework Programme, Project HEALTHGRAIN (FOOD-CT-2005-514008, for HM and KP), Sigrid Juselius foundation, The Finnish Diabetes Research Foundation, Nordic Centre of Excellence on Systems Biology in Controlled Dietary Interventions and Cohort Studies (SYSDIET, 070014), TEKES 70103/06, The EVO-fund of Kuopio University Hospital (5254), Fazer bakeries Oy, Vaasan & Vaasan Oy, KE Leipä Oy, Leipomo Ruistähkä, Leipomo Koskelonseutu, Raisio Oyj, Pakkasmarja Oy, Joswola Oy. The funders had no role in study design, data collection and analysis, decision to publish, or preparation of the manuscript.

**Competing Interests:** Fazer bakeries Oy, Vaasan & Vaasan Oy, KE Leipä Oy, Leipomo Ruistähkä, Leipomo Koskelonseutu, Raisio Oyj, Pakkasmarja Oy and Joswola Oy are commercial companies. They volunteered to contribute their products to the intervention. The authors gave this opportunity to many companies and do not have any commitment with these companies. Therefore they state that no competing interest exists.

\* E-mail: Maria.Lankinen@vtt.fi

## Introduction

The beneficial health effects related to consumption of whole grain [1–3], fish or fish oil supplements [4,5] and polyphenol rich foods such as berries [6] are well documented. However, the synergistic effects of these foods on lipid and glucose metabolism in persons at risk for type 2 diabetes have not yet been investigated.

In epidemiological studies the intake of whole grain has been associated with lower risk of obesity, insulin resistance, elevated

fasting glucose and the incidence of diabetes [7]. Rye bread induces post-prandially lower insulin response than wheat independently of the fiber content [8–10]. Additionally, a twelve-week consumption of low insulin response diet (rye bread and pasta) has been shown to enhance early insulin secretion in persons with metabolic syndrome [2]. This diet also modulated gene expression profile of abdominal subcutaneous tissue by down-regulating genes involved in insulin signaling and apoptosis [11]. However, while the rye bread and pasta diet did not alter the

lipidomic profile of plasma, the high insulin response diet (oat-wheat bread and potato) led to increased concentrations of proinflammatory lysophosphatidylcholines (LPCs) [12]. This suggests that even a moderate dietary carbohydrate modification may affect the lipid metabolism.

Bilberries are particularly abundant in polyphenols, especially anthocyanins [13]. Growing evidence from animal studies suggests that polyphenols as well as foods and beverages rich in polyphenols may positively influence carbohydrate metabolism by attenuating postprandial glycemic responses and fasting hyperglycemia as well as by improving acute insulin secretion and insulin sensitivity [6]. Human intervention studies using berries or anthocyanin extracts have also demonstrated significant improvements in low density lipoprotein (LDL) oxidation, lipid peroxidation, total plasma antioxidant capacity and dyslipidemia [14].

Epidemiological studies have demonstrated associations between the (n-3) long-chain polyunsaturated fatty acids (PUFA), found mainly in fish, and lower prevalence of insulin resistance and type 2 diabetes [15]. However, clinical trials on (n-3) PUFA-enriched diets have so far led to conflicting results [15–18]. The mechanisms behind the potential beneficial effect of (n-3) PUFA on glucose metabolism are poorly understood. The evidence so far points to the role of insulin receptor signaling [19], inflammation [20,21], cell membrane fatty acid composition [22,23], circulating hormones and adipocytokines [18] or G protein-coupled receptor 120 [24]. By applying a lipidomics approach we have recently shown that an eight-week consumption of fatty fish four to five times per week led to decreased plasma concentrations of potential mediators of lipid-induced insulin resistance and inflammation, including ceramides, diacylglycerols and LPCs [25]. Lipids are known to play a central role in the progression of glucose metabolism towards diabetes [26]. The emergence of lipidomics has enabled the global study of lipids in cells, tissues and biofluids, and revitalized the study of lipids in the context of nutrition research and clinical biomarker discovery [27].

Herein we investigate the effects of whole grain and low insulin response grain products, fatty fish, and bilberries on glucose metabolism and plasma lipidomic profile in individuals with the impaired fasting glucose (IFG) or impaired glucose tolerance (IGT) and features of metabolic syndrome. We also aimed to study whether the increase in plasma eicosapentaenoic acid (EPA) and docosahexaenoic acid (DHA) content is related to the improved glucose metabolism.

## Materials and Methods

The protocol for this trial and supporting CONSORT checklist are available as supporting information; see Checklist S1 and Protocol S1.

### Participants and study design

Participants volunteered to the study and gave their written informed consent. The study plan was approved by the Research Ethics Committee, Hospital District of Northern Savo. The intervention was performed in accordance of Helsinki Declaration.

Altogether 131 participants were recruited for a 12-week parallel controlled dietary intervention study from Kuopio area (**Figure 1**). The inclusion criteria were age 40–70 years, impaired glucose metabolism (fP-gluc 5.6–6.9 mmol/l (IFG) or in oral glucose tolerance test (OGTT) 2 hour P-gluc 7.8–11.0 mmol/l (IGT)) and at least two of the following: BMI 26–39 kg/m<sup>2</sup>, waist circumference  $\geq$ 102 cm in men and  $\geq$ 88 cm in women, serum triglycerides  $\geq$ 1.7 mmol/l, HDL <1.0 mmol/l in men and <1.3 mmol/l in women or blood pressure  $\geq$ 130/ $\geq$ 85 mmHg

or use of medication for hypertension. The cut-off values were based on NCEP Adult Treatment Panel III, 2001. The participants were enrolled in the study sequentially. Of all participants, 86% had at least one medication. In the HealthyDiet group, 5.4% of the participants did not have any medication. The respective proportions were 14.7% and 22.9% in the whole grain enriched diet (WGED) group and Control group ( $\chi^2$ -test,  $p=0.1$ ). Most commonly used medications were statins (27%), angiotensin II inhibitors (27%), beta blockers (23%), calcium antagonists (20%), anticoagulants (17%) and ACE inhibitors (15%). None of the subjects used glucose lowering drugs and uses of statins, beta blockers or diuretics, and hormonal replacement therapy were very similar between the groups (Table 1). Besides some minor exceptions, participants continued their medications unchanged throughout the study.

The participants were randomly assigned by the study nurse to one of the following groups: HealthyDiet, WGED or Control. Randomization was performed by matching according to gender and medians of age, BMI and fasting plasma glucose of the study population at screening. The matching produced equal amounts of the certain strata classes among the groups. Altogether 106 participants completed the study. Majority of the drop-outs did not state the reason for drop-out. The reported reasons were busy at work, difficulty to follow the diet instructions, bad experience of biopsy and other physical or personal reasons. Drop-outs were significantly younger than completers (mean age was  $55\pm 8$  vs.  $59\pm 7$ ), but otherwise did not differ based on their clinical characteristics.

In the HealthyDiet group ( $n=37$ ) the participants replaced their habitually used cereal products with breads having a low postprandial glucose and insulin response, contributing up to 20–25% of total energy intake (40% share of endosperm rye bread, 10% share of sourdough whole meal wheat bread, and 50% share of a selection of commercial rye breads). The recommended intake of whole meal pasta was at least 3.5 deciliter (uncooked) a week. The fiber content (g/100 g) of the study cereal products was: endosperm rye bread 6.9, whole meal wheat bread 6.4, commercial rye breads 10–14.4 and pasta 6. Besides the above mentioned cereal products, one portion of their habitually used cereal product was allowed to be eaten daily, e.g. porridge, cereals or pastries. Participants were also instructed to eat fatty fish meals (100–150 g of fish/meal) three times a week. The following fish species were recommended: salmon, rainbow trout, bream, Baltic herring, roach, vendace, white fish, char, trout, red-fish, mackerel and anchovy. In fish preparation, participants were advised to avoid sources of saturated fat, such as butter and cream. Bilberries were eaten 3 portions per day. Bilberries were served as frozen, puree and dried powder. The total amount of three portions is equivalent to 300 grams of fresh bilberries. Habitual use of other berries was allowed with a max 3–4 portion a week.

In the WGED group ( $n=34$ ), the participants consumed the same cereal products as in the HealthyDiet group. Additionally, they were given whole grain oat biscuits that they were allowed to consume one portion per day on a voluntary basis. Biscuits contained 8–8.5 g/100 g of dietary fiber and 16–18 g/100 g of fat, of which 4.3–7.7 g was saturated. Participants in the WGED group were asked not to change their fish and berry consumption.

In the Control group ( $n=35$ ) participants replaced their habitually used breads with refined wheat breads (dietary fiber 3–4.3 g/100 g) and other cereal products, e.g. porridge or pasta, with low fiber products (<6 g/100 g dietary fiber). Participants were allowed to eat maximum of 1–2 portions of rye products per day. The intake of bilberries was not allowed and other berries were allowed maximum of 3–4 times per week with maximum of 1

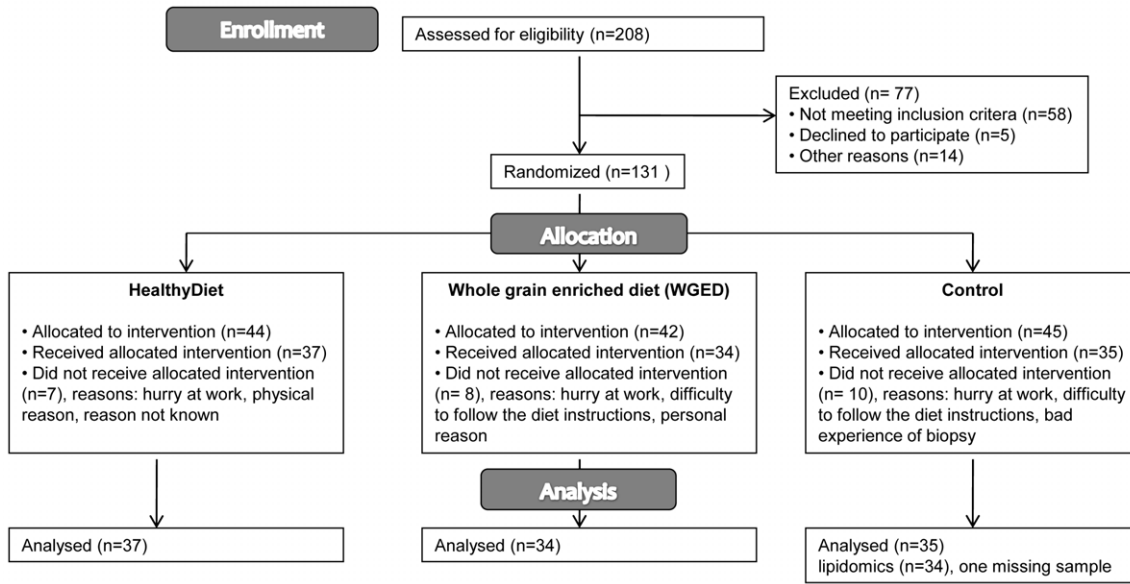

**Figure 1. Flow diagram of the study.**  
doi:10.1371/journal.pone.0022646.g001

deciliter at a time. Fish was allowed to be eaten no more than once a week. Otherwise, the habitual diet and living habits were kept unchanged in all groups.

Participants recorded daily the use of the test breads (all groups), pasta (HealthyDiet and WGED), oat biscuits (WGED), bilberries (HealthyDiet), and fish (HealthyDiet). Four-day food records

**Table 1. Baseline characteristics of the participants.**<sup>1,2</sup>

|                                                                    | HealthyDiet n= 37 | WGED <sup>3</sup> n= 34 | Control n= 35 |
|--------------------------------------------------------------------|-------------------|-------------------------|---------------|
| <b>Gender, male/female</b>                                         | 17/20             | 17/17                   | 18/17         |
| <b>Age, years</b>                                                  | 58±7              | 58±8                    | 59±7          |
| <b>Body weight, kg</b>                                             | 89.8±12.2         | 89.2±15.3               | 89.7±13.0     |
| <b>Body mass index, kg/m<sup>2</sup></b>                           | 31.1±3.6          | 31.4±3.4                | 31.0±3.6      |
| <b>Waist circumference, cm</b>                                     | 105.6±9.5         | 106.3±11.1              | 105.8±10.0    |
| <b>Serum cholesterol, mmol/l</b>                                   | 5.1±0.9           | 5.1±1.0                 | 5.4±1.0       |
| <b>LDL cholesterol, mmol/l</b>                                     | 3.1±0.7           | 3.2±0.8                 | 3.4±0.8       |
| <b>HDL cholesterol, mmol/l</b>                                     | 1.3±0.3           | 1.2±0.4                 | 1.3±0.3       |
| <b>Serum triacylglycerols, mmol/l</b>                              | 1.6±0.6           | 1.5±0.8                 | 1.5±0.8       |
| <b>Fasting plasma glucose, mmol/l</b>                              | 6.1±0.5           | 6.1±0.4                 | 6.2±0.5       |
| <b>Plasma glucose OGTT 2 hour, mmol/l</b>                          | 6.7±1.7           | 6.6±1.6                 | 6.8±1.9       |
| <b>Systolic blood pressure, mmHg</b>                               | 137±13            | 135±16                  | 139±12        |
| <b>Diastolic blood pressure, mmHg</b>                              | 89±7              | 86±8                    | 88±7          |
| <b>How many of the MetS characteristics fulfilled:<sup>4</sup></b> |                   |                         |               |
| <b>2 characteristics, %</b>                                        | 11                | 15                      | 14            |
| <b>3 characteristics, %</b>                                        | 43                | 38                      | 43            |
| <b>4 characteristics, %</b>                                        | 24                | 29                      | 29            |
| <b>5 characteristics, %</b>                                        | 22                | 18                      | 14            |
| <b>Use of statins, n</b>                                           | 10                | 10                      | 9             |
| <b>Use of hormonal replacement therapy, n</b>                      | 3                 | 4                       | 3             |
| <b>Use of beta blocker or diuretics, n</b>                         | 11                | 12                      | 9             |

<sup>1</sup>Values are mean ± SD,

<sup>2</sup>There were no significant differences in clinical characteristics between the groups at baseline,

<sup>3</sup>Whole grain enriched diet,

<sup>4</sup>On top of the impaired fasting glucose or glucose tolerance.

doi:10.1371/journal.pone.0022646.t001

(consecutive days) that included one weekend day were kept by the study persons during the run-in period and three times during the intervention period in all groups.

### Two-hour oral-glucose-tolerance test

OGTT was performed at baseline and after the 12-week intervention. After the fasting blood sample was drawn, the participants drank a glucose solution (75 g glucose/3 dl) within 3 min. Blood samples were drawn through the catheter 30, 60, 120 min after the beginning of the glucose solute ingestion for the measurement of plasma glucose and insulin concentrations. The glucose and insulin areas under the curve (AUCs) were calculated.

Disposition index (DI) is a product of measures of insulin sensitivity and first-phase insulin secretion which is predictive of conversion to diabetes [28,29]. Insulinogenic index (IGI) and quantitative insulin sensitivity check index (QUICKI) were calculated as following:  $IGI = (\text{insulin } 30 \text{ min} - \text{insulin } 0 \text{ min, pmol/L}) / (\text{glucose } 30 \text{ min} - \text{glucose } 0 \text{ min, mmol/L})$ , and  $QUICKI = 1 / (\lg_{10}(\text{insulin } 0 \text{ min, mU/L}) + \lg_{10}(\text{glucose } 0 \text{ min, mg/dl}))$ . Disposition index was calculated as a product of IGI and QUICKI. Homeostasis model of insulin resistance (HOMA-IR) was calculated as following:  $(\text{fasting glucose mmol/l} \times \text{fasting insulin mU/L}) / 22.5$ .

### Biochemical analyses

Concentrations of serum total, LDL and HDL cholesterol and triglycerides were analyzed using commercial kits (981813, 981656, 981823 and 981786, respectively, Thermo Electron Corporation, Vantaa, Finland) and Thermo Fisher Konelab 20XTi Analyzer (Thermo Electron Corporation, Vantaa, Finland). Plasma insulin concentration was analyzed with a chemiluminescent immunoassay (Advia Centaur Immunoassay System, Siemens Medical Solution Diagnostics, Tarrytown, NY, USA). Plasma glucose was analyzed by using Konelab 20XTi Clinical Chemistry Analyzer and Enzymatic photometric (glucose hexokinase) method (Konelab System Reagents, Thermo Fisher Scientific, Vantaa, Finland).

### Fatty acids

Fasting blood samples for fatty acids and lipidomics analyses were taken before and after the intervention. Both samples were available from 105 participants (HealthyDiet group  $n = 37$ , WGED group  $n = 34$ , Control group  $n = 34$ ). Lipids from plasma samples (50  $\mu$ l) were extracted by a mixture of chloroform and methanol (2:1, 400  $\mu$ l) after addition of 40  $\mu$ l NaCl 0.9% (0.15 M) and 10  $\mu$ l internal standard (heptadecantrienoate TG C17:0 1659.24 mg/l+FFA C17:0 584.1 mg/l). The mixture was vortexed 1 min and incubated 30 min at room temperature. The lower layer was separated (centrifuged 10 000 rpm 5 min) and evaporated into dryness under nitrogen flow.

The residue was dissolved into petroleum ether (700  $\mu$ l, boiling point 40–60° C) and vortexed. Bound fatty acids were transmethylated with NaOMe (250  $\mu$ l, sodium methoxide in dry methanol 0.5 M) by vortexing and boiling at 45° C for 5 minutes. The mixture was acidified by adding 15% solution of NaHSO<sub>4</sub> (500  $\mu$ l) and evaporated petroleum ether was substituted by adding 200  $\mu$ l of it (vortexed). The mixture was transferred into microtubes (glass tubes washed with 200  $\mu$ l of petroleum ether) and centrifuged 10 000 rpm, 5 min. The petroleum ether layer containing FAME and FFA was separated into a GC vial, evaporated under nitrogen flow and redissolved into hexane (500  $\mu$ l) and vortexed.

1  $\mu$ l aliquots were used for GC injection at 260° C (splitless). The Agilent 7890 Gas Chromatography equipped with HP-FFAP

Polyethylene Glycol TP column (25 m×200  $\mu$ m×0.3  $\mu$ m) was used. H<sub>2</sub> was used as carrier gas at a total flow of 44.5 ml/min. The initial oven temperature was 70° C for 1.5 min and the temperature was increased at rate of 15° C/min until 240° C. The fatty acids were detected by flame ionization detector at 300° C.

### Lipidomics

Plasma samples (10  $\mu$ l) were diluted with 10  $\mu$ l sodium chloride (0.9%) and 20  $\mu$ l of an internal standard mixture containing 10 lipid classes and 100  $\mu$ l chloroform/methanol (2:1) were added. The mixture was homogenised by vortexing 2 minutes and the extraction time was around 40 minutes at room temperature. After centrifugation (10000 RPM, 3 minutes), an exact aliquot (60  $\mu$ l) of the lower layer was transferred into an HPLC vial insert and 10  $\mu$ l an external standard mixture containing 3 labelled standards was added to the lipid extract. The sample order for LC/MS analysis was randomised.

Lipid extracts were analyzed on a Waters Q-ToF Premier mass spectrometer combined with ultra performance liquid chromatography (UPLC). The column was an Acquity UPLC™ BEH C18 2.1×100 mm with 1.7  $\mu$ m particles. Column temperature was kept at 50° C and the temperature of the sample organizer was set at 10° C. The binary solvent system consisted of A. water (1% 1M NH<sub>4</sub>Ac, 0.1% HCOOH) and B. LC-MS grade isopropanol:acetonitrile (1:1, 1% 1M NH<sub>4</sub>Ac, 0.1% HCOOH). The gradient started from 65% A/35% B and reached 80% B in 2 min, 100% B in 7 minutes and remained at this level for next 7 minutes. The total run time including a 4 min re-equilibration step was 18 min. The flow rate was 400  $\mu$ l/min and the injection volume 2.0  $\mu$ l.

The data was collected in centroid form by using electro spray ionization + mode at mass range of  $m/z$  300–1200 and with scan duration of 0.2 sec. The voltages of the sampling cone and capillary were 40.0 V and 3.0 kV, respectively. The source temperature was set at 120° C and nitrogen was used as desolvation gas (795 L/h) at 270° C. Reserpine (200  $\mu$ g/L) was the lock spray reference compound at a flow rate of 8  $\mu$ l/min and the scan was done at 10 s frequency.

The data was processed by using MZmine 2 software [30] and the lipid identification was based on an internal spectral library. The MZmine 2 data processing included chromatogram building, peak deconvolution, deisotoping, alignment, filtering and gap filling. The quality of data was first estimated by checking the shifts in retention times and peaks in the blank control samples. There were the maximum of 0.02 minute shifts in the retention times of standard compounds and only a few peaks were documented in the blanks.

Lipids were identified by comparing with an internal spectral library including MS and MS/MS data. All monoacyl lipids except cholesteryl esters, such as monoacylglycerols and monoacyl-glycerophospholipids, were normalized with PC(17:0/0:0), all diacyl lipids except ethanolamine phospholipids with PC(17:0/17:0), all ceramides with Cer(d18:1/17:0), all ethanolamine phospholipids with PE(17:0/17:0), and all TG and cholesteryl esters with TG(17:0/17:0/17:0). Unidentified lipids were calibrated with PC(17:0/0:0) for retention times less than 300 seconds, with PC(17:0/17:0) for retention times between 300 and 410 seconds, and with TG(17:0/17:0/17:0) for higher retention times. Identifications and exact fatty acid compositions of all of the most interesting lipids were confirmed with MS/MS analyses.

### Statistical analyses

The primary aim of this study was to see changes in glucose metabolism. Power calculations were based on fasting glucose. By using test significance  $\alpha$ -level 0.05, 80% power and aim to see 5%

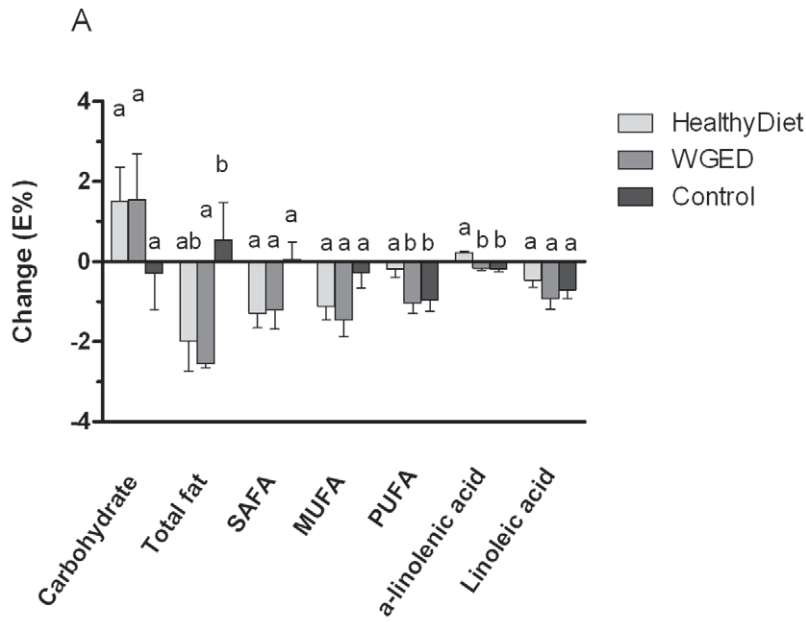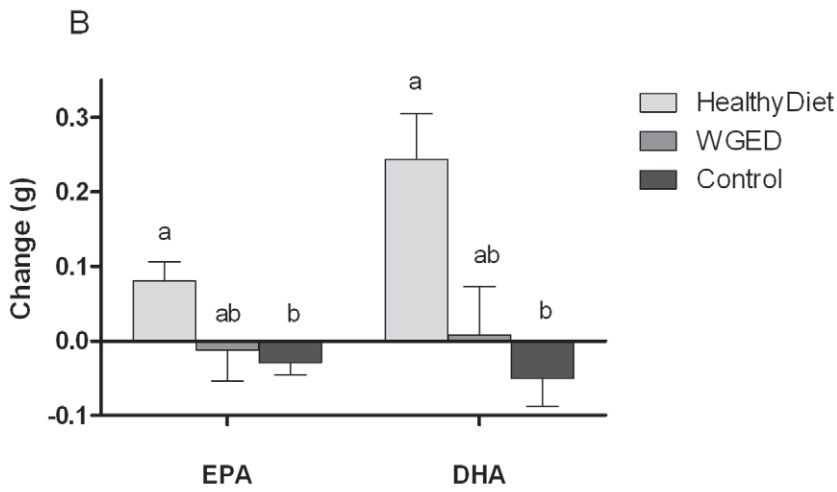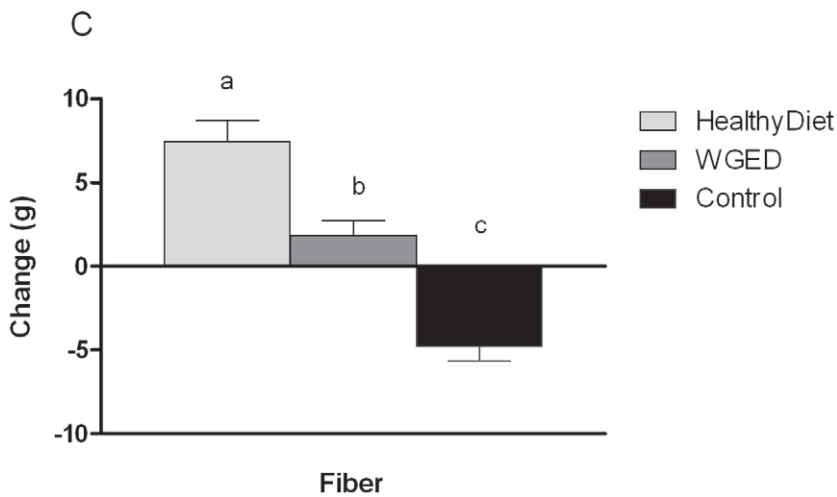

**Figure 2. Changes in dietary intake during the 12-week intervention in the HealthyDiet (n = 36), Whole grain enriched diet (WGED) (n = 34) and Control (n = 35) groups.** Bars represent mean of absolute changes  $\pm$  SD. Means without a common letter differ in mixed model comparison, FDR  $p < 0.05$ .

doi:10.1371/journal.pone.0022646.g002

difference between the groups the appropriate sample size was 37/group. Statistical analyses were performed using the SPSS statistical software (version 14.0, SPSS Inc., Chicago, IL) and R Project for Statistical Computing version 2.7.2 [31] and nlme R-package version 3.1–96 [32]. The normality of the distributions of the variables was estimated based on histograms. Linear mixed-effect models were used to analyze group differences in the baseline and during the intervention. Quantitative dependent variables were transformed to base-10 logarithmic scale to account for non-normal distributions. Selected confounding phenotypes were included in the models as covariates (age, gender, BMI, insulin and glucose), and participant's identifiers were included as a grouping random effect. Interaction term between group and intervention time-point (before or after intervention) was used to examine group related changes during the intervention. The Control group was used as a reference group when comparing group differences. Benjamini-Hochberg false discovery rate (FDR) was used to adjust results for multiple comparisons [33]. FDR  $p$ -value  $< 0.05$  was considered as statistically significant. The association of EPA and DHA with DI was tested using Spearman rank correlation and linear regression model (age, gender and weight changes were included

in the model). The results from regression model need to be discussed with reservation, since the distributions of the variables were not normal. Kruskal-Wallis test was performed in order to test differences in changes in DI between different EPA and DHA quartiles.

## Results

### Clinical characteristics and dietary intake

There were no statistically significant differences between the groups at baseline (**Table 1**). The results of the basic clinical and biochemical parameters (apart from glucose and insulin) during the intervention periods will be reported elsewhere. Body weight remained constant during the study in all groups.

Self-reported compliance with the diets was good. The mean test bread consumption during the intervention period was 7.7, 7.9 and 6.8 portions per day in the HealthyDiet, WGED and Control groups, respectively. In the HealthyDiet group, the mean fish consumption was 3.3 fish meals per week. Mostly used fish species were salmon, rainbow trout, vendace and Baltic herring. The mean bilberry consumption in the HealthyDiet group was 3.2 portions per day.

**Table 2. Glucose and insulin parameters at baseline and after the 12-week intervention.**<sup>1</sup>

|                                             | HealthyDiet $n = 37$         |                               |                            |                                 | WGED <sup>2</sup> $n = 34$    |                               |                            |                                 | Control $n = 35$ |                 |                            |
|---------------------------------------------|------------------------------|-------------------------------|----------------------------|---------------------------------|-------------------------------|-------------------------------|----------------------------|---------------------------------|------------------|-----------------|----------------------------|
|                                             | 0 wk                         | 12 wk                         | FDR $p$ group <sup>3</sup> | FDR $p$ time*group <sup>4</sup> | 0 wk                          | 12 wk                         | FDR $p$ group <sup>3</sup> | FDR $p$ time*group <sup>4</sup> | 0 wk             | 12 wk           | FDR $p$ group <sup>3</sup> |
| <b>Fasting glucose (mmol/L)</b>             | 6.1 $\pm$ 0.5                | 6.0 $\pm$ 0.5                 | 0.71                       | 0.91                            | 6.1 $\pm$ 0.4                 | 6.1 $\pm$ 0.5                 | 0.99                       | 0.90                            | 6.2 $\pm$ 0.5    | 6.2 $\pm$ 0.5   | 0.81                       |
| <b>Glucose 2 h (mmol/L)</b>                 | 6.7 $\pm$ 1.7                | 6.0 $\pm$ 0.5                 | <b>0.027</b>               | 0.53                            | 6.6 $\pm$ 1.6                 | 6.1 $\pm$ 1.9                 | 0.058                      | 0.68                            | 6.9 $\pm$ 1.9    | 6.7 $\pm$ 2.2   | 0.81                       |
| <b>Fasting insulin (mU/L)</b>               | 11.7 $\pm$ 5.9               | 12.5 $\pm$ 6.3                | 0.37                       | 0.91                            | 12.0 $\pm$ 6.2                | 13.7 $\pm$ 8.0                | 0.16                       | 0.73                            | 12.8 $\pm$ 6.6   | 13.2 $\pm$ 6.3  | 0.81                       |
| <b>Insulin 2 h (mU/L)</b>                   | 62.6 $\pm$ 48.2              | 61.3 $\pm$ 46.7               | 0.69                       | 0.91                            | 78.3 $\pm$ 65.6               | 65.9 $\pm$ 59.9               | 0.16                       | 0.67                            | 72.1 $\pm$ 54.2  | 72.3 $\pm$ 55.7 | 0.95                       |
| <b>AUC<sup>5</sup> for glucose (mmol/L)</b> | 241 $\pm$ 130                | 190 $\pm$ 121                 | <b>0.027</b>               | 0.49                            | 233 $\pm$ 128                 | 204 $\pm$ 137                 | 0.16                       | 0.53                            | 246 $\pm$ 136    | 246 $\pm$ 137   | 0.84                       |
| <b>AUC<sup>4</sup> for insulin (mU/L)</b>   | 6787 $\pm$ 3279              | 7509 $\pm$ 3772               | 0.64                       | 0.91                            | 7650 $\pm$ 6004               | 7523 $\pm$ 4740               | 0.57                       | 0.68                            | 7766 $\pm$ 4173  | 7514 $\pm$ 3861 | 0.89                       |
| <b>HOMA-IR<sup>6</sup></b>                  | 3.2 $\pm$ 1.8                | 3.4 $\pm$ 1.9                 | 0.43                       | 0.91                            | 3.3 $\pm$ 1.7                 | 3.7 $\pm$ 2.3                 | 0.16                       | 0.73                            | 3.6 $\pm$ 2.0    | 3.7 $\pm$ 1.9   | 0.89                       |
| <b>IGI<sup>7</sup></b>                      | 143 $\pm$ 99 <sup>9</sup>    | 212 $\pm$ 251 <sup>10</sup>   | 0.076                      | 0.49                            | 160 $\pm$ 115 <sup>11</sup>   | 169 $\pm$ 113 <sup>11</sup>   | 0.99                       | 0.91                            | 157 $\pm$ 97     | 149 $\pm$ 89    | 0.89                       |
| <b>QUICKY<sup>8</sup></b>                   | 0.33 $\pm$ 0.02              | 0.33 $\pm$ 0.02               | 0.37                       | 0.91                            | 0.33 $\pm$ 0.02               | 0.32 $\pm$ 0.03               | 0.16                       | 0.90                            | 0.32 $\pm$ 0.02  | 0.32 $\pm$ 0.02 | 0.81                       |
| <b>Disposition index</b>                    | 46.3 $\pm$ 30.4 <sup>9</sup> | 67.8 $\pm$ 78.8 <sup>10</sup> | 0.08                       | 0.49                            | 51.5 $\pm$ 35.2 <sup>11</sup> | 53.7 $\pm$ 34.3 <sup>11</sup> | 0.99                       | 0.91                            | 50.0 $\pm$ 28.2  | 47.6 $\pm$ 27.2 | 0.82                       |

<sup>1</sup>Values are mean  $\pm$  SD,

<sup>2</sup>Whole grain enriched diet,

<sup>3</sup>False discovery rate  $p$ -value for effect of time within the groups,

<sup>4</sup>False discovery rate  $p$ -value for interaction of time and group (time\*group),

<sup>5</sup>Area under the curve in 2-hour OGTT,

<sup>6</sup>Homeostasis model of insulin resistance,

<sup>7</sup>Insulinogenic index,

<sup>8</sup>Quantitative insulin sensitivity check index,

<sup>9</sup> $n = 36$ ,

<sup>10</sup> $n = 35$ ,

<sup>11</sup> $n = 32$ .

doi:10.1371/journal.pone.0022646.t002

At the baseline, the intake of dietary fiber was higher in the HealthyDiet group than in the Control and WGED groups (FDR  $p=0.013$ ). Otherwise, dietary intake did not differ at baseline among the groups. Energy intake did not change during the intervention. The intake of EPA, DHA,  $\alpha$ -linolenic acid and fiber increased in the HealthyDiet group compared with the Control group (**Figure 2**). In the WGED group, the intake of total fat decreased and fiber increased compared with the Control group. Within the Control group the intake of PUFA, EPA, DHA and fiber decreased during the intervention.

### Glucose and insulin metabolism

There were no statistical differences in changes of glucose and insulin metabolism between the groups (**Table 2**). In the HealthyDiet group, the within-the-group comparison revealed decreases in the 2-hour glucose concentration and AUC for glucose (Table 2, **Figure 3**). There was a trend towards improved IGI ( $p=0.016$  and FDR  $p=0.076$ ) and DI ( $p=0.019$  and FDR  $p=0.076$ ) within the HealthyDiet group (Table 2, Figure 3).

### Fatty acids and lipidomics

There were no differences in plasma fatty acids between the groups at baseline. Proportions of di-homo- $\gamma$ -linolenic acid

decreased and polyunsaturated long chain fatty acids (docosapentaenoic acid, EPA, DHA) increased in the HealthyDiet group compared with the Controls (**Table 3**). Within the Control group, DHA decreased during the intervention. There were no significant changes in plasma fatty acid composition in the WGED group.

A total of 364 lipids were identified and quantified by the UPLC-MS platform including lipid classes such as TGs, LPCs, phosphatidylcholines (PCs), phosphatidylserines (PSs), phosphatidyl ethanolamines (PEs), sphingomyelins (SMs) and ceramides. There were no significant differences among the groups at baseline. Using the within-the-group comparisons, 152, 91 and 178 lipids changed significantly (FDR  $p<0.05$ ) in the HealthyDiet, WGED and Control groups, respectively. Mixed model analysis revealed 25 significantly changed lipids when comparing the HealthyDiet and the WGED groups to the Control group (**Table 4**). All the significant changes occurred in the HealthyDiet group. Multiple TGs with the long chain PUFAs, including TG(60:12), TG(60:13), TG(58:11), TG(56:10), increased in the HealthyDiet group. Also LPC(20:5), PC(36:5), PC(38:7e), PC(40:7e) and TG(55:7) increased, while the PS(38:2) and LPC(20:3) decreased. LPC(22:6) increased within the HealthyDiet group (FDR  $p=0.005$ ), but in a comparison of all three groups together this increase did not reach the level of statistical significance (FDR  $p=0.088$ ). Odd chain TGs, except TG(55:7), or ceramides did not change during the intervention.

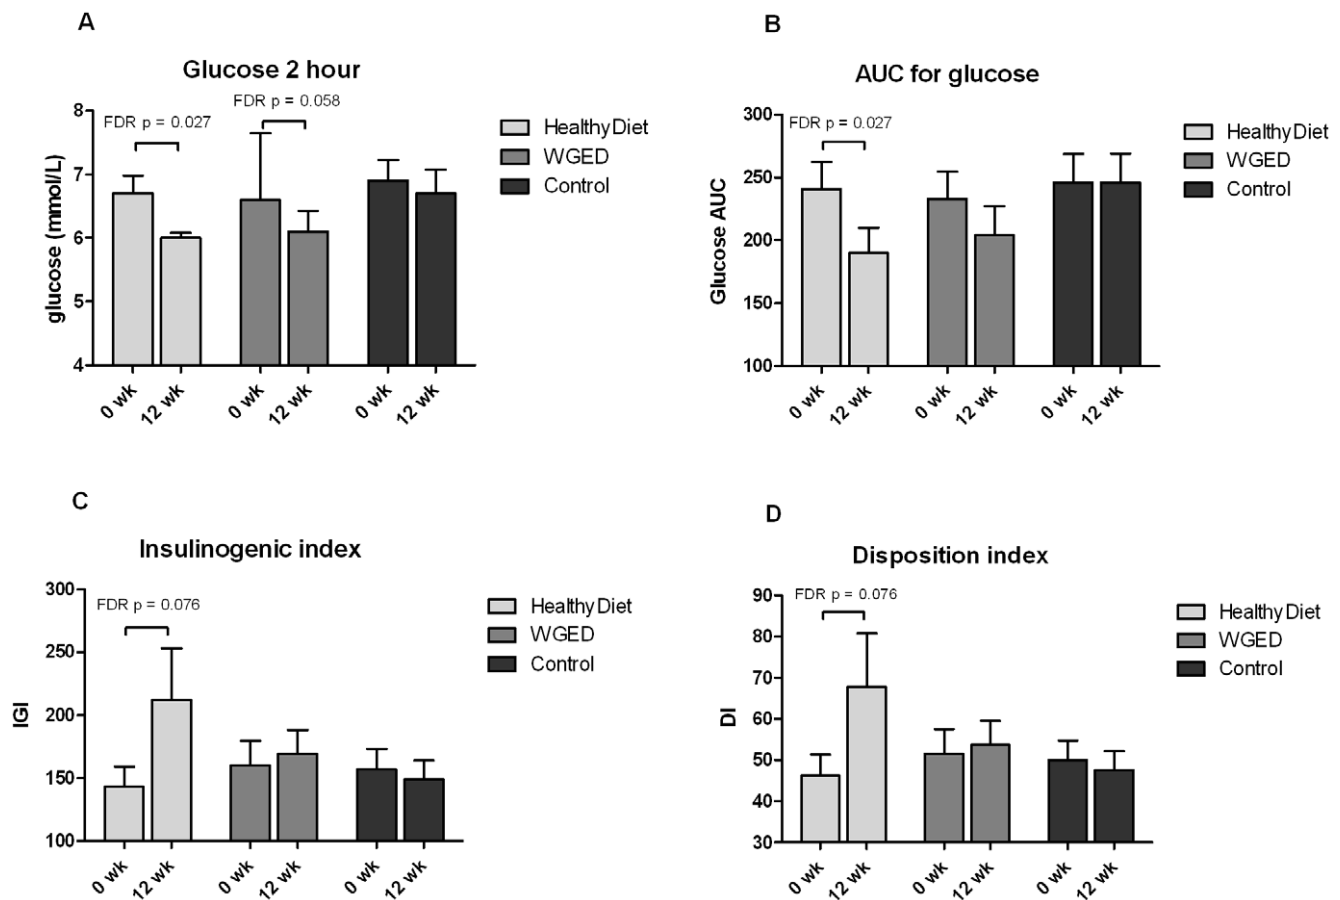

**Figure 3. Bar charts of glucose metabolism parameters in each group before and after the intervention.** A) plasma 2 hour glucose, B) area under the curve (AUC) for glucose, C) Insulinogenic index (IGI) and D) Disposition index (DI) in OGTT. Values are means  $\pm$  SEM,  $n=37$ ,  $34$  and  $35$  in the HealthyDiet, Whole grain enriched diet (WGED) and Control groups, respectively, except for IGI and DI,  $n=36$  before and  $n=35$  after the intervention in the HealthyDiet group, and  $n=32$  before and after the intervention in the WGED group. doi:10.1371/journal.pone.0022646.g003

**Table 3.** Plasma fatty acids at baseline and after the 12-week intervention.<sup>1</sup>

| Fatty acid, %                   | HealthyDiet n = 37 |            |                            |                                | WGED <sup>2</sup> n = 34 |            |                          |                                | Control n = 34 |            |                          |                                |
|---------------------------------|--------------------|------------|----------------------------|--------------------------------|--------------------------|------------|--------------------------|--------------------------------|----------------|------------|--------------------------|--------------------------------|
|                                 | 0 wk               | 12 wk      | FDR p group <sup>3</sup>   | FDR p time* group <sup>4</sup> | 0 wk                     | 12 wk      | FDR p group <sup>3</sup> | FDR p time* group <sup>4</sup> | 0 wk           | 12 wk      | FDR p group <sup>3</sup> | FDR p time* group <sup>4</sup> |
| Myristic (14:0)                 | 1.0±0.47           | 1.09±0.41  | 0.18                       | 0.96                           | 0.82±0.43                | 0.93±0.49  | 0.23                     | 0.82                           | 0.79±0.41      | 0.92±0.42  | 0.22                     | 0.22                           |
| Myristoleic (14:1(n-5))         | 0.10±0.04          | 0.10±0.05  | 0.89                       | 0.92                           | 0.10±0.05                | 0.10±0.05  | 0.64                     | 0.96                           | 0.10±0.05      | 0.10±0.04  | 0.83                     | 0.83                           |
| Pentadecanoic (15:0)            | 0.21±0.05          | 0.21±0.06  | 0.86                       | 0.92                           | 0.21±0.05                | 0.20±0.06  | 0.42                     | 0.81                           | 0.21±0.05      | 0.20±0.05  | 0.56                     | 0.56                           |
| Palmitic acid (16:0)            | 26.90±1.99         | 27.66±2.22 | 0.13                       | 0.58                           | 26.46±1.95               | 27.25±2.17 | 0.07                     | 0.56                           | 26.57±1.59     | 26.86±2.00 | 0.56                     | 0.56                           |
| Palmitoleic (16:1(n-7))         | 2.66±0.92          | 2.58±0.77  | 0.89                       | 0.76                           | 2.58±0.72                | 2.79±0.79  | 0.23                     | 0.76                           | 2.36±0.72      | 2.41±0.64  | 0.82                     | 0.82                           |
| Stearic (18:0)                  | 9.08±0.90          | 9.42±0.95  | <b>0.045</b>               | 0.76                           | 8.93±0.98                | 8.94±1.19  | 0.64                     | 0.57                           | 8.95±0.85      | 9.14±1.00  | 0.35                     | 0.35                           |
| Oleic (18:1(n-9))               | 23.40±3.19         | 22.31±3.37 | <b>0.009</b>               | 0.09                           | 23.58±2.93               | 23.80±2.97 | 0.64                     | 0.96                           | 23.00±2.88     | 23.12±2.66 | 0.87                     | 0.87                           |
| Cis-vaccenic (18:1(n-7))        | 2.38±0.33          | 2.12±0.30  | <b>7 × 10<sup>-4</sup></b> | 0.11                           | 2.47±0.28                | 2.41±0.36  | 0.42                     | 0.83                           | 2.31±0.28      | 2.21±0.23  | 0.08                     | 0.08                           |
| Linoleic (18:2(n-6))            | 19.39±3.29         | 18.52±3.09 | 0.13                       | 0.32                           | 20.13±2.31               | 19.41±2.67 | 0.33                     | 0.53                           | 20.59±3.03     | 20.66±3.02 | 0.75                     | 0.75                           |
| γ-linolenic (18:3(n-6))         | 0.23±0.08          | 0.23±0.11  | 0.79                       | 0.16                           | 0.20±0.07                | 0.22±0.08  | 0.23                     | 0.82                           | 0.22±0.08      | 0.26±0.12  | 0.07                     | 0.07                           |
| α-linolenic (18:3(n-3))         | 0.96±0.26          | 1.10±0.23  | <b>0.002</b>               | 0.09                           | 1.02±0.36                | 0.94±0.35  | 0.23                     | 0.46                           | 1.00±0.34      | 1.00±0.26  | 0.88                     | 0.88                           |
| Di-homo-γ-linolenic (20:3(n-6)) | 1.79±0.32          | 1.61±0.35  | <b>0.001</b>               | <b>7 × 10<sup>-4</sup></b>     | 1.79±0.45                | 1.77±0.44  | 0.90                     | 0.46                           | 1.78±0.41      | 1.85±0.32  | 0.26                     | 0.26                           |
| Arachidonic (20:4(n-6))         | 6.09±1.25          | 5.45±0.99  | <b>0.004</b>               | 0.27                           | 6.08±1.58                | 5.79±1.41  | 0.32                     | 0.92                           | 6.31±1.52      | 6.09±1.52  | 0.51                     | 0.51                           |
| EPA (20:5(n-3))                 | 1.60±0.77          | 2.55±1.21  | <b>9 × 10<sup>-4</sup></b> | <b>7 × 10<sup>-4</sup></b>     | 1.51±0.69                | 1.41±0.91  | 0.42                     | 0.92                           | 1.66±0.96      | 1.45±0.76  | 0.17                     | 0.17                           |
| DPA (22:5(n-3))                 | 0.83±0.18          | 0.95±0.24  | <b>0.001</b>               | <b>1 × 10<sup>-4</sup></b>     | 0.79±0.14                | 0.80±0.18  | 0.64                     | 0.46                           | 0.84±0.16      | 0.80±0.16  | 0.18                     | 0.18                           |
| DHA (22:6(n-3))                 | 3.43±1.09          | 4.10±1.09  | <b>7 × 10<sup>-4</sup></b> | <b>5 × 10<sup>-7</sup></b>     | 3.34±0.14                | 3.22±1.3   | 0.23                     | 0.46                           | 3.31±0.98      | 2.92±0.99  | <b>0.009</b>             | <b>0.009</b>                   |

<sup>1</sup>Values are mean ± SD, n = 105,<sup>2</sup>Whole grain enriched diet,<sup>3</sup>False discovery rate p-value for effect of time within the groups,<sup>4</sup>False discovery rate p-value for interaction of time and group (time\*group).

doi:10.1371/journal.pone.0022646.t003



**Table 4.** Lipids that change significantly different between the groups after the 12-week intervention period.<sup>1</sup>

| Lipid                  | Beta HD <sup>2</sup> vs. Control | FDR $p$ HD <sup>2</sup> vs. Control <sup>3,4</sup> | Beta HD <sup>4</sup> | FDR $p$ HD <sup>2,4,5</sup> | Beta WGED <sup>6</sup> | FDR $p$ WGED <sup>4,5,6</sup> | Beta Control | FDR $p$ Control <sup>4,5</sup> | Beta HD <sup>2</sup> vs. WGED <sup>6</sup> | FDR $p$ HD <sup>2</sup> vs. WGED <sup>6,7</sup> |
|------------------------|----------------------------------|----------------------------------------------------|----------------------|-----------------------------|------------------------|-------------------------------|--------------|--------------------------------|--------------------------------------------|-------------------------------------------------|
| TG(60:13)              | 0.35                             | <b>0.007</b>                                       | 0.35                 | $7 \times 10^{-6}$          | 0.06                   | 0.43                          | -0.01        | 0.87                           | 0.27                                       | 0.08                                            |
| TG(60:12)              | 0.46                             | $3 \times 10^{-4}$                                 | 0.42                 | $3 \times 10^{-6}$          | 0.07                   | 0.37                          | -0.05        | 0.49                           | 0.33                                       | 0.07                                            |
| TG(60:12) <sup>8</sup> | 0.43                             | $5 \times 10^{-4}$                                 | 0.41                 | $5 \times 10^{-6}$          | 0.08                   | 0.27                          | -0.03        | 0.66                           | 0.31                                       | 0.07                                            |
| TG(58:11)              | 0.33                             | <b>0.008</b>                                       | 0.37                 | $4 \times 10^{-6}$          | 0.08                   | 0.33                          | 0.04         | 0.50                           | 0.27                                       | 0.08                                            |
| TG(58:11) <sup>8</sup> | 0.29                             | <b>0.013</b>                                       | 0.34                 | $4 \times 10^{-6}$          | 0.06                   | 0.43                          | 0.05         | 0.38                           | 0.26                                       | 0.08                                            |
| TG(58:10)              | 0.24                             | <b>0.026</b>                                       | 0.30                 | $4 \times 10^{-6}$          | 0.05                   | 0.42                          | 0.06         | 0.29                           | 0.23                                       | 0.08                                            |
| TG(58:10) <sup>8</sup> | 0.22                             | <b>0.041</b>                                       | 0.31                 | $4 \times 10^{-6}$          | 0.08                   | 0.23                          | 0.08         | 0.18                           | 0.21                                       | 0.08                                            |
| TG(56:10)              | 0.24                             | <b>0.013</b>                                       | 0.31                 | $4 \times 10^{-6}$          | 0.07                   | 0.31                          | 0.05         | 0.26                           | 0.22                                       | 0.08                                            |
| TG(56:9)               | 0.22                             | <b>0.041</b>                                       | 0.31                 | $4 \times 10^{-6}$          | 0.06                   | 0.38                          | 0.09         | 0.14                           | 0.24                                       | 0.07                                            |
| TG(56:6)               | 0.17                             | <b>0.019</b>                                       | 0.18                 | $6 \times 10^{-6}$          | 0.04                   | 0.44                          | -0.001       | 0.97                           | 0.13                                       | 0.12                                            |
| TG(55:7)               | 0.27                             | <b>0.036</b>                                       | 0.29                 | $7 \times 10^{-5}$          | 0.10                   | 0.17                          | 0.01         | 0.87                           | 0.19                                       | 0.19                                            |
| TG(54:8)               | 0.25                             | <b>0.020</b>                                       | 0.31                 | $5 \times 10^{-6}$          | 0.08                   | 0.24                          | 0.05         | 0.40                           | 0.21                                       | 0.08                                            |
| PC(40:7e)              | 0.14                             | <b>0.013</b>                                       | 0.11                 | $3 \times 10^{-4}$          | 0.04                   | 0.31                          | -0.03        | 0.25                           | 0.06                                       | 0.35                                            |
| PC(40:7e) <sup>8</sup> | -0.15                            | <b>0.041</b>                                       | -0.03                | 0.48                        | 0.09                   | <b>0.044</b>                  | 0.12         | <b>0.007</b>                   | -0.13                                      | 0.08                                            |
| PC(40:4)               | -0.23                            | <b>0.040</b>                                       | -0.04                | 0.58                        | 0.12                   | 0.07                          | 0.18         | <b>0.004</b>                   | -0.18                                      | 0.17                                            |
| PC(38:7e)              | 0.13                             | <b>0.013</b>                                       | 0.11                 | $2 \times 10^{-4}$          | 0.02                   | 0.63                          | -0.02        | 0.39                           | 0.08                                       | 0.19                                            |
| PC(38:7)               | 0.15                             | <b>0.040</b>                                       | 0.19                 | $1 \times 10^{-5}$          | 0.08                   | 0.08                          | 0.03         | 0.49                           | 0.10                                       | 0.22                                            |
| PC(38:4e)              | -0.14                            | <b>0.013</b>                                       | -0.03                | 0.33                        | 0.03                   | 0.22                          | 0.10         | <b>0.004</b>                   | -0.07                                      | 0.24                                            |
| PC(36:5)               | 0.19                             | <b>0.013</b>                                       | 0.24                 | $4 \times 10^{-6}$          | 0.07                   | 0.13                          | 0.04         | 0.41                           | 0.16                                       | 0.08                                            |
| PE(40:7)               | -0.13                            | <b>0.040</b>                                       | -0.08                | <b>0.032</b>                | 0.04                   | 0.24                          | 0.06         | 0.10                           | -0.12                                      | 0.08                                            |
| PE(38:7e)              | 0.20                             | <b>0.013</b>                                       | 0.20                 | $2 \times 10^{-5}$          | 0.08                   | 0.09                          | -0.01        | 0.87                           | 0.11                                       | 0.22                                            |
| PE(38:4)/PC(35:4)      | -0.13                            | <b>0.013</b>                                       | -0.02                | 0.43                        | 0.06                   | <b>0.048</b>                  | 0.10         | <b>0.009</b>                   | -0.09                                      | 0.08                                            |
| PS(38:2)               | -0.14                            | <b>0.013</b>                                       | -0.09                | <b>0.010</b>                | 0.02                   | 0.54                          | 0.05         | 0.10                           | -0.11                                      | 0.08                                            |
| LPC(20:5)              | 0.21                             | <b>0.007</b>                                       | 0.15                 | <b>0.002</b>                | -0.001                 | 0.97                          | -0.05        | 0.17                           | 0.16                                       | 0.08                                            |

<sup>1</sup> $n = 105$ ,<sup>2</sup>HealthyDiet group,<sup>3</sup>False discovery rate  $p$ -value for interaction of time and group (time\*group), the HealthyDiet group compared with the Controls,<sup>4</sup>Age, gender, BMI, Insulin and glucose are used as covariates,<sup>5</sup>False discovery rate  $p$ -value for effect of time within the groups,<sup>6</sup>Whole grain enriched diet group,<sup>7</sup>False discovery rate  $p$ -value for interaction of time and group, the HealthyDiet group compared with the WGED group,<sup>8</sup>Lipids which are mentioned twice are isobaric, meaning that the fatty acid composition differs.

doi:10.1371/journal.pone.0022646.t004

## Association between plasma EPA and DHA and glucose metabolism

Regression model revealed significant association between the changes in plasma EPA and DHA with changes in IGI ( $R = 0.366$ ,  $p = 0.009$  and  $R = 0.379$ ,  $p = 0.006$ ) and DI ( $R = 0.366$ ,  $p = 0.009$  and  $R = 0.382$ ,  $p = 0.005$ , respectively). The inclusion of changes in the fiber intake in the regression model did not alter associations. There were also positive correlations between the changes in EPA and DHA and changes in IGI ( $r = 0.309$ ,  $p = 0.002$  and  $r = 0.413$ ,  $p < 0.001$ , respectively) and DI ( $r = 0.313$ ,  $p = 0.002$  and  $r = 0.341$ ,  $p = 0.001$ , respectively). IGI and DI improved most in the highest quartiles of changes in EPA and DHA during the 12-week intervention (Figure 4).

## Discussion

We studied the effects of whole grain and low insulin response grain products, fatty fish, and bilberries on glucose metabolism, plasma fatty acids and lipidomic profile in individuals with features of the metabolic syndrome. We found that diet with high intake of

whole grain and low insulin response grain products, fatty fish and bilberries (HealthyDiet) appeared to improve glucose metabolism and altered plasma lipidomic profile markedly, while exclusive carbohydrate modification caused only minor changes. Interestingly, we identified an association between the increases in plasma EPA and DHA contents and improvement in glucose metabolism.

A decreased AUC for glucose and a trend towards improved IGI and DI in the HealthyDiet group suggest that the intake of whole grain and low insulin response grain products, fatty fish and bilberries had positive effects on insulin secretion and glucose disposal in this study. There was also a trend towards improved 2-hour glucose, but not for IGI and DI, in the WGED group. The results for IGI and DI were very similar, which is not surprising as DI is calculated from IGI. In the entire study group, a higher increase in EPA and DHA was curvilinearly associated with IGI and DI and thus to improved glucose metabolism. Besides fatty fish, bilberries may also have had a role in the improved glucose metabolism, but we do not have a biomarker for bilberry intake which would have enabled better estimation of its effects. However, not all subjects in the 4<sup>th</sup> quartile of EPA and DHA

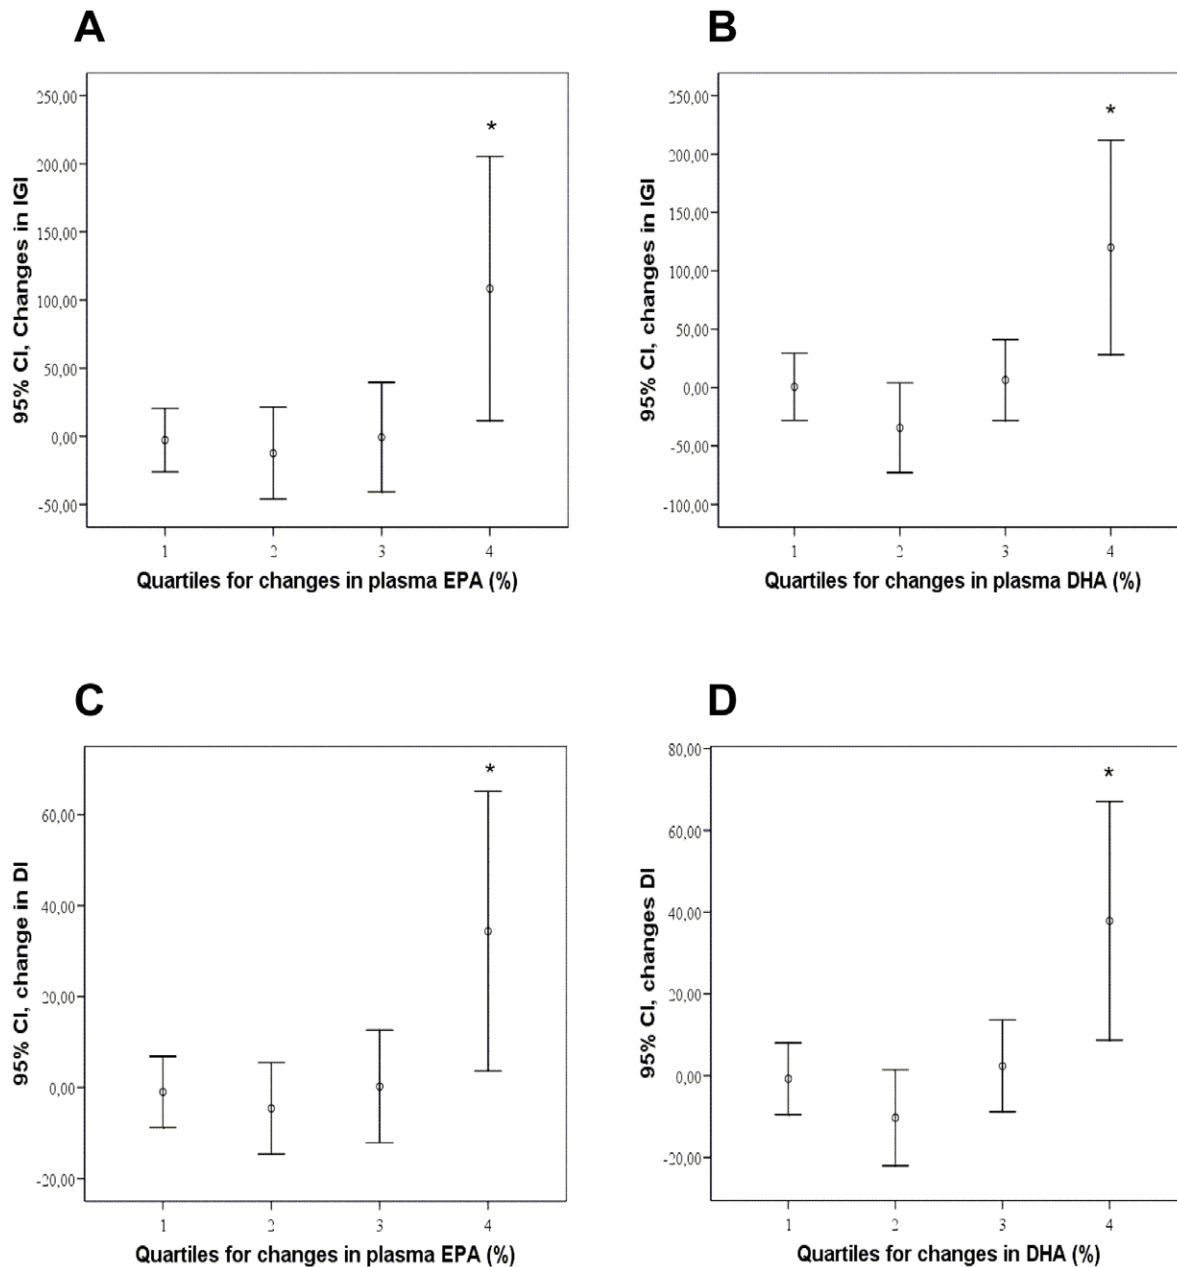

**Figure 4. Associations between glucose metabolism and plasma EPA and DHA content.** Changes in insulinogenic index (IGI) (A and B) and disposition index (DI) (C and D) during the intervention period (95% Confidence interval) according to quartiles of changes in plasma EPA (A and C) and DHA (B and D) content (%). \*  $p < 0.01$  in Kruskal-Wallis test. All groups combined,  $n = 99$ . Ranges of changes in EPA quartiles: 1 =  $-2.3$ – $0.4\%$  units; 2 =  $-0.3$ – $0.1\%$  units; 3 =  $0.1$ – $0.6\%$  units; 4 =  $0.6$ – $4.2\%$  units, and in DHA quartiles: 1 =  $-2.4$ – $0.6\%$  units; 2 =  $-0.6$ – $0.1\%$  units; 3 =  $-0.04$ – $0.7\%$  units; 4 =  $0.7$ – $3.0\%$  units.

doi:10.1371/journal.pone.0022646.g004

changes were in the HealthyDiet group, which suggests that changes in the EPA and DHA may have an independent association with the glucose metabolism. Recently, Stull and colleagues [34] showed that insulin sensitivity was enhanced after 6 wk dietary supplementation with bioactive substances from bilberries in 32 obese, insulin-resistant persons.

Results from the intervention studies regarding the effects of (n-3) PUFA of animal origin on glucose metabolism (mostly insulin resistance) have been variable and most of the studies have been performed with fish oil supplements [18]. There are multiple

discrepancies between the (n-3) PUFA intervention studies relating to e.g. methods they have used to assess glucose metabolism, health status of participants, diet or duration of the study [18]. Improvements in insulin resistance have not been observed in healthy individuals or diabetic persons, but the positive effects have been identified in obese individuals [16,18,35]. Our study population could have been an optimal target group for the application of dietary strategy to improve glucose metabolism, since the participants had IFG or IGT, but not diabetes. However, the diet rich in whole grain and low insulin response grain

products, bilberries and fatty fish did not alter insulin resistance but instead improved insulin secretion in this study. Associations between the changes in plasma EPA and DHA content and improved IGI and DI were curvilinear (Figure 4), meaning that the improved insulin secretion and glucose disposal existed only in the highest quartiles of changes in EPA and DHA. This may partly explain the discrepancy on the evidence related to (n-3) PUFA of animal origin and glucose metabolism. Future studies are needed to confirm these results and to find the optimal amount of fish needed to achieve improvement in insulin metabolism in subjects with IFG or IGT.

High-carbohydrate-low-GI diet has been shown to improve DI in persons with impaired glucose tolerance [2,36] or type 2 diabetes [37]. In two studies the duration of the low-GI diet has been 4 to 12 months until the increase in DI has become evident [36,37]. However, Laaksonen and colleagues detected improved DI after 12-week consumption of carbohydrate modified diet with cereal products replaced with rye-based products and whole-grain pasta [2]. It is unlikely, but still possible, that our intervention period of 12-weeks was too short to observe the improvement in DI in the WGED group, while the effects of (n-3) PUFA appeared earlier. In addition, the improvement in DI in the HealthyDiet group might have reached the level of statistical significance after the longer intervention period. Moreover, there were slight differences in the cereal diets between WGED group and in the study of Laaksonen *et al* [2] that might have had an impact on the differences found.

Fatty acid analyses revealed increases in the plasma content of long chain (n-3) PUFAs in the HealthyDiet group, whereas in the Control group plasma content of DHA decreased without a change in the WGED group. Furthermore, lipidomics analysis revealed increases in TGs with long chain (n-3) PUFAs in the HealthyDiet group. These changes confirm the good compliance with the instructions of fish intake. Interestingly, we detected increases in highly unsaturated TGs in the HealthyDiet group (*e.g.* TG(60:12) and TG(60:13)), which we have not identified in our previous studies.

We observed increased plasma concentrations of LPC species in the HealthyDiet group. LPCs are linked with atherosclerosis by virtue of their effects on arterial wall, smooth muscle cells and macrophages, although also other putative antiatherogenic effects have been demonstrated [38]. LPC is a major component of oxidized LDL [38,39]. In high density lipoprotein (HDL) fraction, it is more abundant in persons with high HDL cholesterol [40]. The acyl chains in LPC and lysophosphatidic acid (LPA) molecules vary from saturated to highly unsaturated, and from 14 to 22 carbons, and their biological functions may vary depending on the acyl chain [38,41,42]. Block and colleagues [42] demonstrated that dietary EPA and DHA fatty acids are incorporated into plasma LPCs, but not into LPAs. Here we found increase in LPC(20:5) after a 12-week consumption of fatty fish. LPC(22:6) also increased within the HealthyDiet group, but among the groups this increase did not reach the level of statistical significance. The ability to increase LPC(20:5) and LPC(22:6) with dietary ingestion of fatty fish may be important, since LPC are believed to be major carriers of DHA to the brain [43].

We found an increase of odd chain triglyceride TG(55:7) in the HealthyDiet group. Other odd chain TG:s did not change. Odd chain fatty acids 15:0 and 17:0 have been considered as a biomarker of dairy fat intake, and thus even hypothesized to have protective effects against heart disease, stroke and insulin resistance [44–47]. These observations have been based on plasma and adipose tissue levels of 15:0 and 17:0 rather than dietary recording methods. Contradictory, association between the intake

of dairy fat and relative serum content of 17:0 have not been clear in every study [48] and also inverse associations have been observed [49]. Furthermore, in the large cohort study EPIC, there was a strong positive correlation ( $r=0.8$ ,  $p\leq 0.01$ ) between the total intake of fish and plasma content of 17:0 [50]. In our study, plasma 15:0 did not change during the intervention, and 17:0 was used as an internal standard in the fatty acid analyses, so we could not determine its plasma levels. However, TGs with the odd number of carbons most likely include 15:0 and 17:0 fatty acids. Based on 4-day food diaries dietary intake of SAFA decreased from 12 E% to 10.7 E% within the HealthyDiet group. This indicates compliance to the instruction to avoid cream and butter in fish preparation. Decreased dairy fat intake should also have been shown in a decrease of odd chain fatty acids, if those could be considered as good biomarkers for dairy fat intake. Fatty acid 17:0 is present in the fat of fish in low amounts (0.31–2.0% depending on fish species) [51,52]. Salmon contains around 40 mg of 17:0 and 20 mg of 15:0 fatty acids per 100 g of fish [53]. Our results suggest that intake of odd chain fatty acids from dairy fat decreased, but instead the same amount of it came from fatty fish, keeping the plasma concentration constant. Therefore, we believe that it is questionable to consider odd chain fatty acids as biomarkers of dairy fat intake and the associated health effects might as well be related to high intake of fish. Further studies are needed to address this issue.

In the WGED group, we did not find significant changes in lipids in comparison with the Control group. This is consistent with our earlier findings, *i.e.*, the intake of low insulin response grain products (rye bread and pasta) [12] or the intake of high-fiber rye bread [54] did not lead to changes in serum lipidomic profiles. Changes in the HealthyDiet group are different than those which we found in our previous study, where the study persons ate at least 4 fatty or lean fish meals per week [25]. In that study, unlike in the present one, we found a decrease in plasma ceramides and LPCs as a result of fatty fish diet. However, participants in that study were coronary heart disease patients with multiple medications, which may have affected the results. This discrepancy also suggests that even if carbohydrate modification itself does not markedly change serum lipidomic profile, it has effects with bilberries and fatty fish, which cause changes in lipidomic profile. On the other hand, it is possible that the intake of three fish meals per week was not enough to see all the effects, which were detectable after four fish meals per week. Furthermore, the power calculations were based on fasting glucose, and it is possible that there was not enough power to see all changes in lipidomics or other glucose parameters. To see also the individual effects of fish or bilberries, and also synergistic effects of grain products, fish and bilberries, separate intervention groups with increased intake of only fish or only bilberries would have been needed.

In conclusion, our results suggest that diet rich in whole grain and low insulin response grain products, bilberries, and fatty fish alter plasma lipidomic profiles and may be associated with improved glucose metabolism. Therefore, in long-term these dietary components may have a beneficial role in the prevention of type 2 diabetes in persons with impaired glucose metabolism.

## Supporting Information

**Checklist S1 CONSORT checklist.**  
(DOC)

**Protocol S1 Trial protocol.**  
(DOC)

## Acknowledgments

We thank Marketta Puttonen, Kaija Kettunen and Tuomas Onnukka for the assistance during the intervention, Tiina Lappalainen and Jenni Lappi for the dietary counseling, Anna-Liisa Ruskeepää for the fatty acid analysis, Heli Nygren for the MS-MS analyses, Sandra Castillo, Laxman Yetukuri and Heli Nygren for the processing of the lipidomics data and Vanessa De Mello Laaksonen for counseling in glucose and insulin metabolism.

## References

- Anderson JW (2003) Whole grains protect against atherosclerotic cardiovascular disease. *Proc Nutr Soc* 62: 135–142.
- Laaksonen DE, Toppinen LK, Juntunen KS, Autio K, Liukkonen KH, et al. (2005) Dietary carbohydrate modification enhances insulin secretion in persons with the metabolic syndrome. *Am J Clin Nutr* 82: 1218–1227.
- Mellen PB, Walsh TF, Herrington DM (2008) Whole grain intake and cardiovascular disease: a meta-analysis. *Nutr Metab Cardiovasc Dis* 18: 283–290.
- He K, Song Y, Daviglius ML, Liu K, Van Horn L, et al. (2004) Accumulated evidence on fish consumption and coronary heart disease mortality: a meta-analysis of cohort studies. *Circulation* 109: 2705–2711.
- Breslow JL (2006) N-3 Fatty Acids and Cardiovascular Disease. *Am J Clin Nutr* 83: 1477S–1482S.
- Hanhineva K, Torronen R, Bondia-Pons I, Pekkinen J, Kolehmainen M, et al. (2010) Impact of dietary polyphenols on carbohydrate metabolism. *Int J Mol Sci* 11: 1365–1402.
- Lutsey PL, Jacobs DR, Jr., Kori S, Mayer-Davis E, Shea S, et al. (2007) Whole grain intake and its cross-sectional association with obesity, insulin resistance, inflammation, diabetes and subclinical CVD: The MESA Study. *Br J Nutr* 98: 397–405.
- Leinonen K, Liukkonen K, Poutanen K, Uusitupa M, Mykkanen H (1999) Rye bread decreases postprandial insulin response but does not alter glucose response in healthy Finnish subjects. *Eur J Clin Nutr* 53: 262–267.
- Juntunen KS, Laaksonen DE, Autio K, Niskanen LK, Holst JJ, et al. (2003) Structural differences between rye and wheat breads but not total fiber content may explain the lower postprandial insulin response to rye bread. *Am J Clin Nutr* 78: 957–964.
- Rosen LA, Blanco Silva LO, Andersson UK, Holm C, Ostman EM, et al. (2009) Endosperm and whole grain rye breads are characterized by low post-prandial insulin response and a beneficial blood glucose profile. *Nutr J* 8: 42–52.
- Kallio P, Kolehmainen M, Laaksonen DE, Kekalainen J, Salopuro T, et al. (2007) Dietary carbohydrate modification induces alterations in gene expression in abdominal subcutaneous adipose tissue in persons with the metabolic syndrome: the FUNGENUT Study. *Am J Clin Nutr* 85: 1417–1427.
- Lankinen M, Schwab U, Gopalacharyulu PV, Seppanen-Laakso T, Yetukuri L, et al. (2010) Dietary carbohydrate modification alters serum metabolic profiles in individuals with the metabolic syndrome. *Nutr Metab Cardiovasc Dis* 20: 249–257.
- Maatta-Riihinen KR, Kamal-Eldin A, Mattila PH, Gonzalez-Paramas AM, Torronen AR (2004) Distribution and contents of phenolic compounds in eighteen Scandinavian berry species. *J Agric Food Chem* 52: 4477–4486.
- Basu A, Rhone M, Lyons TJ (2010) Berries: emerging impact on cardiovascular health. *Nutr Rev* 68: 168–177.
- Nettleton JA, Katz R (2005) N-3 Long-Chain Polyunsaturated Fatty Acids in Type 2 Diabetes: a Review. *J Am Diet Assoc* 105: 428–440.
- Ramel A, Martinez A, Kiely M, Morais G, Bandarra NM, et al. (2008) Beneficial effects of long-chain n-3 fatty acids included in an energy-restricted diet on insulin resistance in overweight and obese European young adults. *Diabetologia* 51: 1261–1268.
- Giacco R, Cuomo V, Vessby B, Uusitupa M, Hermansen K, et al. (2007) Fish oil, insulin sensitivity, insulin secretion and glucose tolerance in healthy people: is there any effect of fish oil supplementation in relation to the type of background diet and habitual dietary intake of n-6 and n-3 fatty acids? *Nutr Metab Cardiovasc Dis* 17: 572–580.
- Fedor D, Kelley DS (2009) Prevention of insulin resistance by n-3 polyunsaturated fatty acids. *Curr Opin Clin Nutr Metab Care* 12: 138–146.
- Taouis M, Dagou C, Ster C, Durand G, Pinault M, et al. (2002) N-3 polyunsaturated fatty acids prevent the defect of insulin receptor signaling in muscle. *Am J Physiol Endocrinol Metab* 282: E664–71.
- Browning LM, Krebs JD, Moore CS, Mishra GD, O'Connell MA, et al. (2007) The impact of long chain n-3 polyunsaturated fatty acid supplementation on inflammation, insulin sensitivity and CVD risk in a group of overweight women with an inflammatory phenotype. *Diabetes Obes Metab* 9: 70–80.
- Rasic-Militinovic Z, Perunicic G, Pljesa S, Gluvic Z, Sobajic S, et al. (2007) Effects of N-3 PUFAs supplementation on insulin resistance and inflammatory biomarkers in hemodialysis patients. *Ren Fail* 29: 321–329.
- Borkman M, Storlien LH, Pan DA, Jenkins AB, Chisholm DJ, et al. (1993) The relation between insulin sensitivity and the fatty-acid composition of skeletal-muscle phospholipids. *N Engl J Med* 328: 238–244.

## Author Contributions

Conceived and designed the experiments: US MK KP HM HG MU MO. Performed the experiments: ML TS-L. Analyzed the data: ML JP. Contributed reagents/materials/analysis tools: MO. Wrote the paper: ML US MO MU.

- Blank ML, Smith ZL, Lee YJ, Snyder F (1989) Effects of eicosapentaenoic and docosahexaenoic acid supplements on phospholipid composition and plasmalogen biosynthesis in P388D1 cells. *Arch Biochem Biophys* 269: 603–611.
- Oh da Y, Talukdar S, Bae EJ, Imamura T, Morinaga H, et al. (2010) GPR120 is an omega-3 fatty acid receptor mediating potent anti-inflammatory and insulin-sensitizing effects. *Cell* 142: 687–698.
- Lankinen M, Schwab U, Erkkila A, Seppanen-Laakso T, Hannila ML, et al. (2009) Fatty fish intake decreases lipids related to inflammation and insulin signaling—a lipidomics approach. *PLoS One* 4: e5258.
- Wymann MP, Schneider R (2008) Lipid signalling in disease. *Nat Rev Mol Cell Biol* 9: 162–176.
- Roberts LD, McCombie G, Titman CM, Griffin JL (2008) A matter of fat: an introduction to lipidomic profiling methods. *J Chromatogr B Analyt Technol Biomed Life Sci* 871: 174–181.
- Lorenzo C, Wagenknecht LE, Rewers MJ, Karter AJ, Bergman RN, et al. (2010) Disposition Index, Glucose Effectiveness, and Conversion to Type 2 Diabetes: The Insulin Resistance Atherosclerosis Study (IRAS). *Diabetes Care* 33: 2098–2103.
- Elbein SC, Hasstedt SJ, Wegner K, Kahn SE (1999) Heritability of pancreatic beta-cell function among nondiabetic members of Caucasian familial type 2 diabetic kindreds. *J Clin Endocrinol Metab* 84: 1398–1403.
- Pluskal T, Castillo S, Villar-Briones A, Oresic M (2010) MZmine 2: modular framework for processing, visualizing, and analyzing mass spectrometry-based molecular profile data. *BMC Bioinformatics* 11: 395.
- R Development Core Team. R: A language and environment for statistical computing. 2010; Available at: <http://www.R-project.org>, 2010.
- Pinheiro J, Bates D, DebRoy S, Sarkar D, the R Core team (2010) *nlme: Linear and Nonlinear Mixed Effects Models*. R package version 3: 1–96.
- Benjamini Y, Hochberg Y (1995) Controlling the false discovery rate: a practical and powerful approach to multiple testing. *J R Statist Soc B* 57: 289–300.
- Stull AJ, Cash KC, Johnson WD, Champagne CM, Cefalu WT (2010) Bioactives in blueberries improve insulin sensitivity in obese, insulin-resistant men and women. *J Nutr* 140: 1764–1768.
- Egert S, Fobker M, Andersen G, Somoza V, Erbersdobler HF, et al. (2008) Effects of dietary alpha-linolenic acid, eicosapentaenoic acid or docosahexaenoic acid on parameters of glucose metabolism in healthy volunteers. *Ann Nutr Metab* 53: 182–187.
- Wolever TM, Mehling C (2002) High-carbohydrate-low-glycaemic index dietary advice improves glucose disposition index in subjects with impaired glucose tolerance. *Br J Nutr* 87: 477–487.
- Wolever TM, Mehling C, Chiasson JL, Josse RG, Leiter LA, et al. (2008) Low glycaemic index diet and disposition index in type 2 diabetes (the Canadian trial of carbohydrates in diabetes): a randomised controlled trial. *Diabetologia* 51: 1607–1615.
- Schmitz G, Ruebsaamen K (2010) Metabolism and atherogenic disease association of lysophosphatidylcholine. *Atherosclerosis* 208: 10–18.
- Aiyar N, Disa J, Ao Z, Ju H, Nerurkar S, et al. (2007) Lysophosphatidylcholine induces inflammatory activation of human coronary artery smooth muscle cells. *Mol Cell Biochem* 295: 113–120.
- Yetukuri L, Soderlund S, Koivuniemi A, Seppanen-Laakso T, Niemela PS, et al. (2010) Composition and lipid spatial distribution of HDL particles in subjects with low and high HDL-cholesterol. *J Lipid Res* 51: 2341–2351.
- Hayashi K, Takahashi M, Nishida W, Yoshida K, Ohkawa Y, et al. (2001) Phenotypic modulation of vascular smooth muscle cells induced by unsaturated lysophosphatidic acids. *Circ Res* 89: 251–258.
- Block RC, Duff R, Lawrence P, Kakinami L, Brenna JT, et al. (2010) The effects of EPA, DHA, and aspirin ingestion on plasma lysophospholipids and autotaxin. *Prostaglandins Leukot Essent Fatty Acids* 82: 87–95.
- Lagarde M, Bernard N, Brossard N, Lemaître-Delaunay D, Thies F, et al. (2001) Lysophosphatidylcholine as a preferred carrier form of docosahexaenoic acid to the brain. *J Mol Neurosci* 16: 201–4; discussion 215–21.
- Smedman AE, Gustafsson IB, Berglund LG, Vessby BO (1999) Pentadecanoic acid in serum as a marker for intake of milk fat: relations between intake of milk fat and metabolic risk factors. *Am J Clin Nutr* 69: 22–29.
- Warenso E, Smedman A, Stegmayr B, Hallmans G, Weinehall L, et al. (2009) Stroke and plasma markers of milk fat intake—a prospective nested case-control study. *Nutr J* 8: 21.
- Iggman D, Arnlov J, Vessby B, Cederholm T, Sjogren P, et al. (2010) Adipose tissue fatty acids and insulin sensitivity in elderly men. *Diabetologia* 53: 850–857.

47. Biong AS, Veierod MB, Ringstad J, Thelle DS, Pedersen JI (2006) Intake of milk fat, reflected in adipose tissue fatty acids and risk of myocardial infarction: a case-control study. *Eur J Clin Nutr* 60: 236–244.
48. Wolk A, Furuheim M, Vessby B (2001) Fatty acid composition of adipose tissue and serum lipids are valid biological markers of dairy fat intake in men. *J Nutr* 131: 828–833.
49. Brevik A, Veierod MB, Drevon CA, Andersen LF (2005) Evaluation of the odd fatty acids 15:0 and 17:0 in serum and adipose tissue as markers of intake of milk and dairy fat. *Eur J Clin Nutr* 59: 1417–1422.
50. Saadatian-Elahi M, Slimani N, Chajes V, Jenab M, Goudable J, et al. (2009) Plasma phospholipid fatty acid profiles and their association with food intakes: results from a cross-sectional study within the European Prospective Investigation into Cancer and Nutrition. *Am J Clin Nutr* 89: 331–346.
51. Ozogul Y, Ozogul F, Cicek E, Polat A, Kuley E (2008) Fat content and fatty acid compositions of 34 marine water fish species from the Mediterranean Sea. *Int J Food Sci Nutr*. pp 1–12.
52. Aggelousis G, Lazos ES (1991) Fatty Acid Composition of the Lipids from Eight Freshwater Fish Species from Greece. *Journal of Food Composition and Analysis*. pp 68–76.
53. Dudek JA, Elkins ER (1986) Effects of cooking on the fatty acid profiles of selected seafoods. In Simonopoulos AP, Kifer RR, eds. *Health effects of polyunsaturated fatty acids in seafoods*. Florida: Academic Press. pp 431–450.
54. Lankinen M, Schwab U, Seppanen-Laakso T, Mattila I, Juntunen K, et al. (2011) Metabolomic Analysis of Plasma Metabolites That May Mediate Effects of Rye Bread on Satiety and Weight Maintenance in Postmenopausal Women. *J Nutr* 141: 31–36.
